# Supplementary material for: A 2D coordination polymer based on Co3-SBU showing spin-canting ferromagnetic behaviour
Source: Royal Society of Chemistry journal article supplement (doi:10.1039/c3ra44331k), 2013-01-01
Supplement: c3ra44331k.pdf [file c3ra44331k.pdf]

*Supporting Information File*

**A 2D coordination polymer based on Co<sub>3</sub> SBU showing spin-canting ferromagnetic behaviour**

**Sajal Khatua, Soumyabrata Goswami, Srinivasulu Parshamoni, Himanshu Sekhar Jena and Sanjit Konar\***

Department of Chemistry, IISER Bhopal, ITI Gas Rahat Building, Govindpura  
Bhopal 462023, M.P. INDIA. Fax: +91-755-4092392; Tel: +91-755-4092336

E-mail: [skonar@iiserb.ac.in](mailto:skonar@iiserb.ac.in)

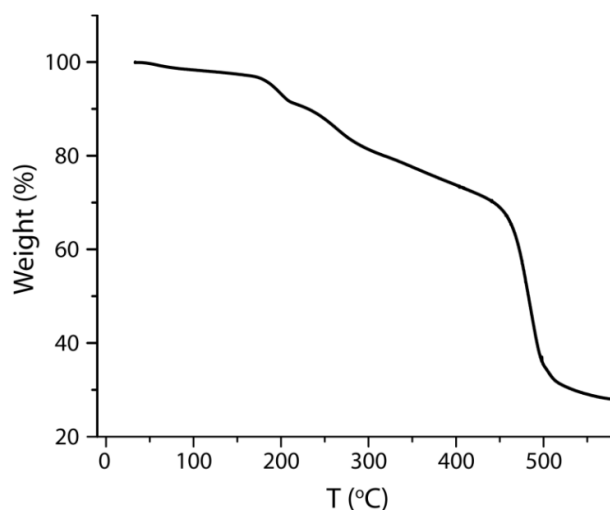

**Fig. S1** TGA plot of complex **1**.

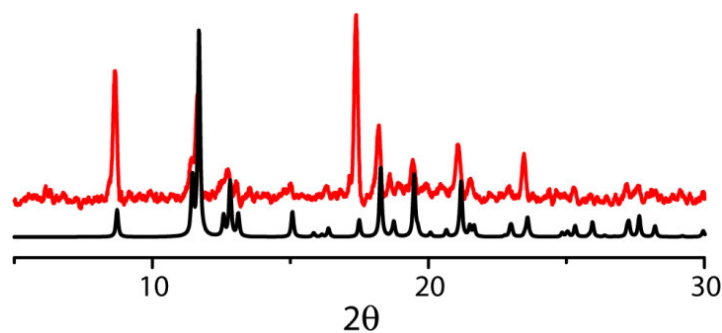

**Fig. S2** PXRD pattern of complex **1** (red (experimental) and black (simulated)).

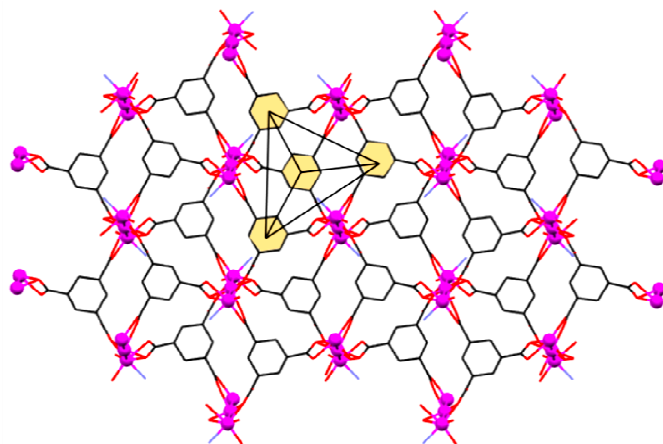

**Fig. S3** Illustration of tetrahedral arrangements of the cyclohexane rings of CTC ligands in the 2D framework.

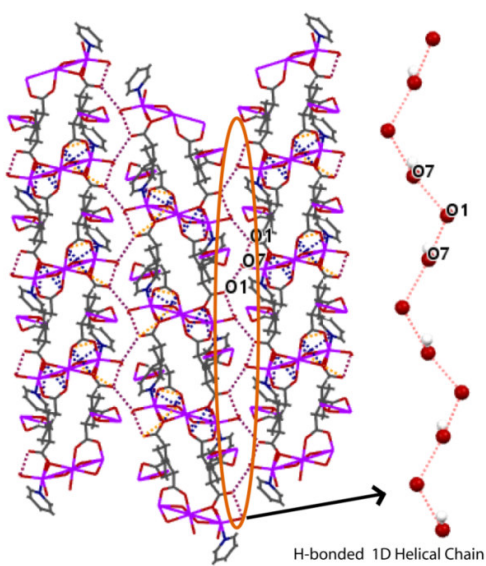

**Fig. S4** Illustration of 1D helical chain originating from the H-bonded interaction between free oxygen atom (O1) of CTC ligand and coordinated hydroxyl group.

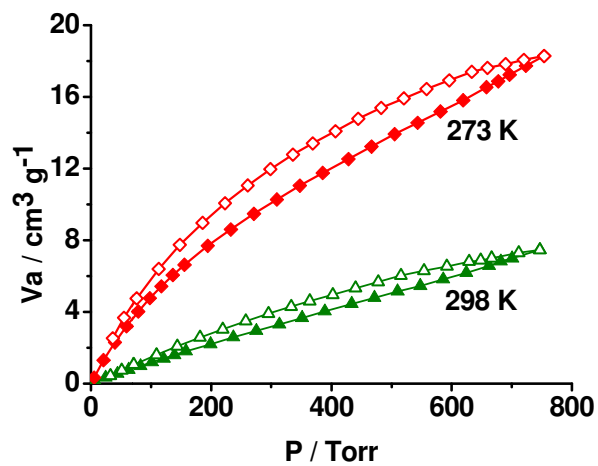

**Fig. S5** CO<sub>2</sub> adsorption-desorption isotherms at 273 K and 298 K for **1**.

**Table S1.** The relevant bond distances (Å) and bond angles (°) around metal centres found in **1**.

| Bond lengths (Å) |           |            |           |
|------------------|-----------|------------|-----------|
| Co1-N1           | 2.126(2)  | Co1-O7     | 2.041(2)  |
| Co1-O2           | 2.121(1)  | Co2-O2     | 2.177(2)  |
| Co1-O3           | 2.134(1)  | Co2-O4     | 2.109(1)  |
| Co1-O4           | 2.272(2)  | Co2-O6     | 2.043(1)  |
| Co1-O5           | 2.003(1)  | Co1-O2     | 3.109(3)  |
| Bond angles (°)  |           |            |           |
| N1-Co1-O2        | 168.0(7)  | O4-Co1-O7  | 160.08(6) |
| N1-Co1-O3        | 85.82(7)  | O5-Co1-O7  | 103.16(7) |
| N1-Co1-O4        | 87.11(6)  | O2-Co2-O4  | 95.68(5)  |
| N1-Co1-O5        | 89.67(7)  | O2-Co2-O4A | 84.32(5)  |
| N1-Co1-O7        | 92.97(7)  | O2-Co2-O6  | 87.92(5)  |
| O2-Co1-O3        | 88.71(6)  | O2-Co2-O6A | 92.08(5)  |
| O2-Co1-O4        | 81.77(5)  | O4-Co2-O6  | 92.64(6)  |
| O2-Co1-O5        | 91.44(6)  | O4-Co2-O6A | 87.36(6)  |
| O2-Co1-O7        | 97.54(6)  | O2-Co2-O2A | 180.00(5) |
| O3-Co1-O4        | 59.63(6)  | O4-Co2-O4A | 180.00(6) |
| O3-Co1-O5        | 156.11(6) | O6-Co2-O6A | 180.00(6) |
| O3-Co1-O7        | 100.49(6) | Co1-O2-Co2 | 92.67(5)  |
| O4-Co1-O5        | 96.76(6)  | Co1-O4-Co2 | 90.33(5)  |
